# Supplementary material
Source: publisher figshare collection journal article supplement (https://frontiersin.figshare.com/ndownloader/files/33157973)
Supplement: Supplementary file [file 33157973]

Supplementary Figure 2

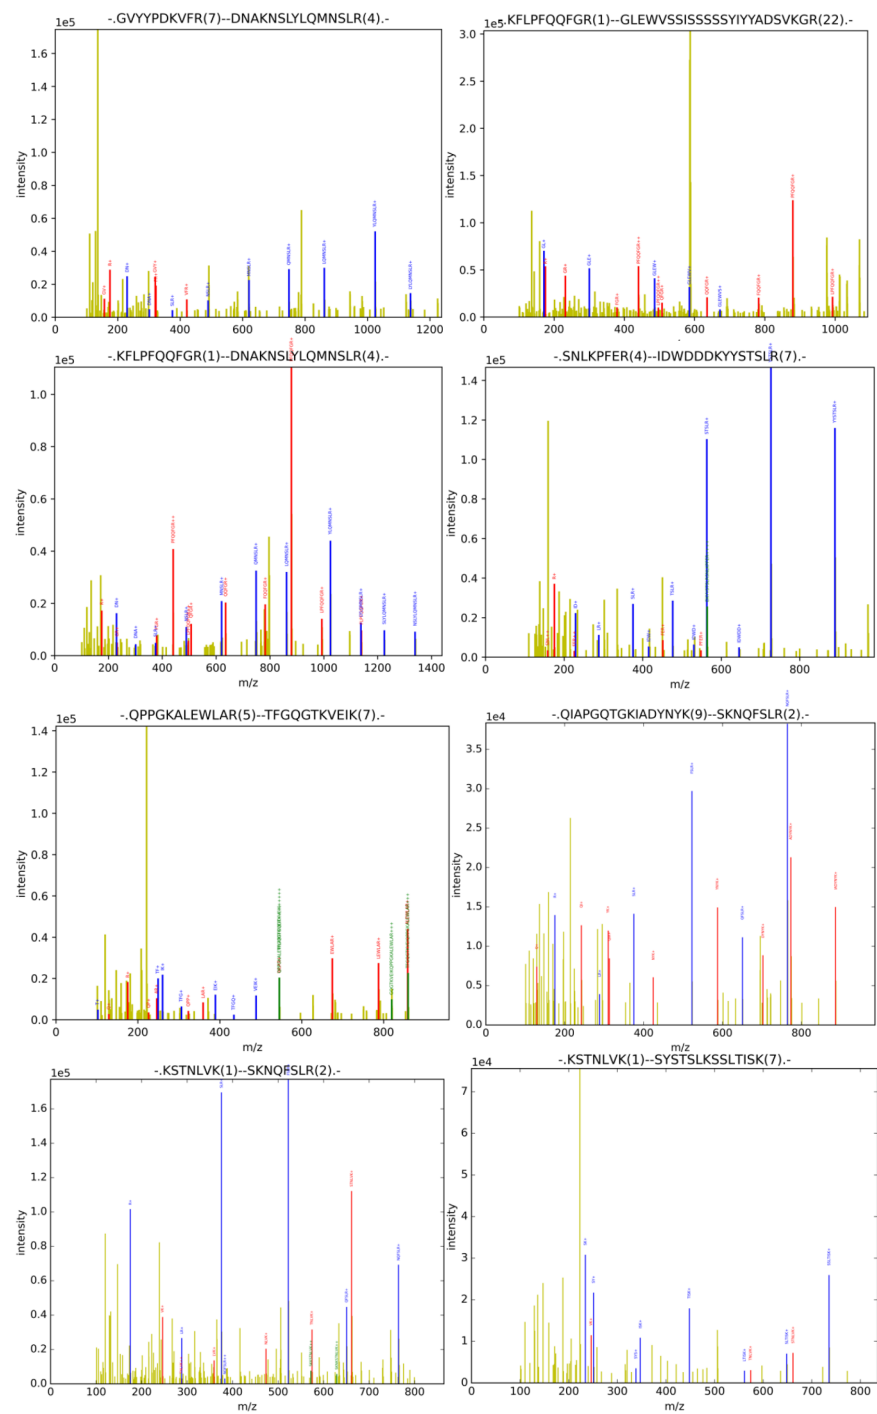

Supplementary Figure 2. MS spectra from Spike-antibody cross-linking experiments.
